# Supplementary material for: A Novel Homodimer Peptide–Drug Conjugate Improves the Efficacy of HER2-Positive Breast Cancer Therapy
Source: MDPI journal article supplement (doi:10.3390/ijms24054590), 2023-02-27
Supplement: s1 [file s1]

# A Novel Homodimer Peptide–Drug Conjugate Improves the Efficacy of HER2-Positive Breast Cancer Therapy

Shurong Liu<sup>†</sup>, Ye Tian<sup>†</sup>, Sujun Jiang and Zihua Wang\*

Fujian Provincial Key Laboratory of Brain Aging and Neurodegenerative Diseases, School of Basic Medical Sciences, Fujian Medical University, Fuzhou 350122, China

\* Correspondence: [wangzh@fjmu.edu.cn](mailto:wangzh@fjmu.edu.cn)

<sup>†</sup> These authors contributed equally to this work.

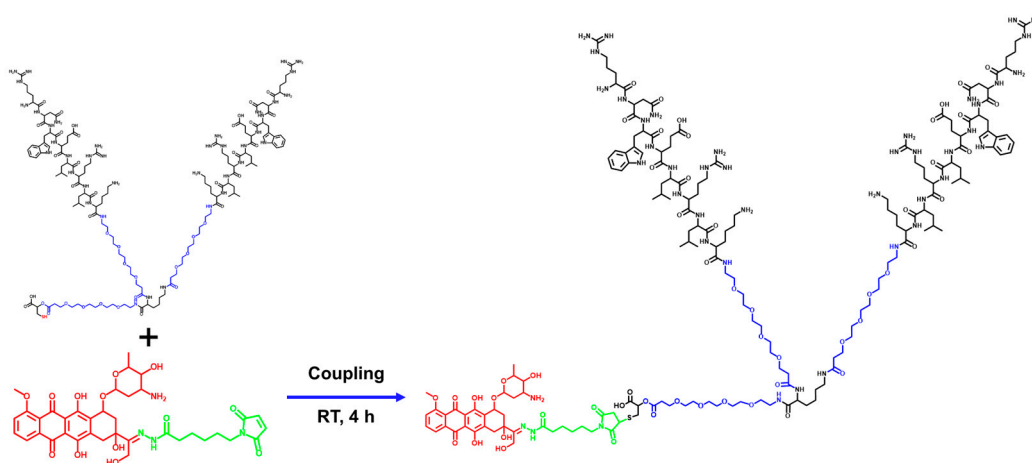

**Figure S1.** Scheme for doxorubicin–HP conjugate synthesis.

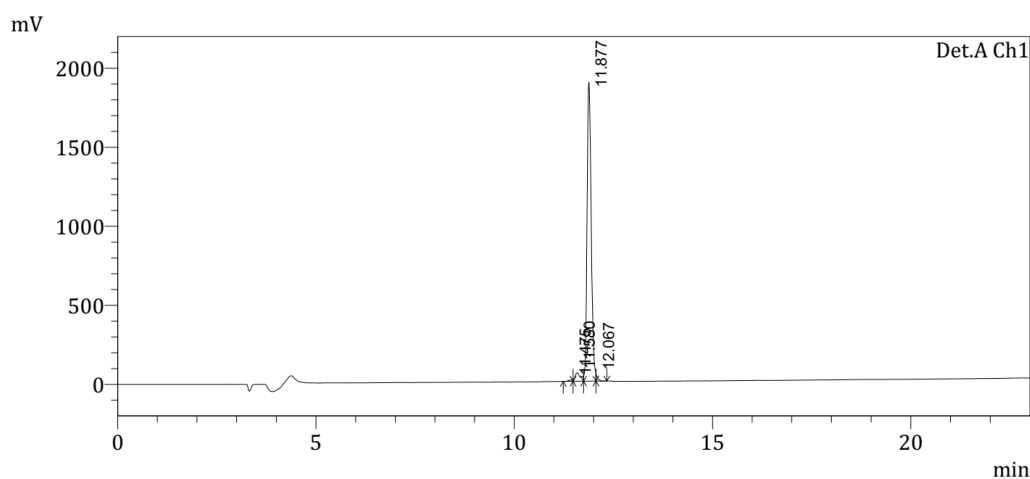

**Figure S2.** Analysis and purification of HP peptide using HPLC.

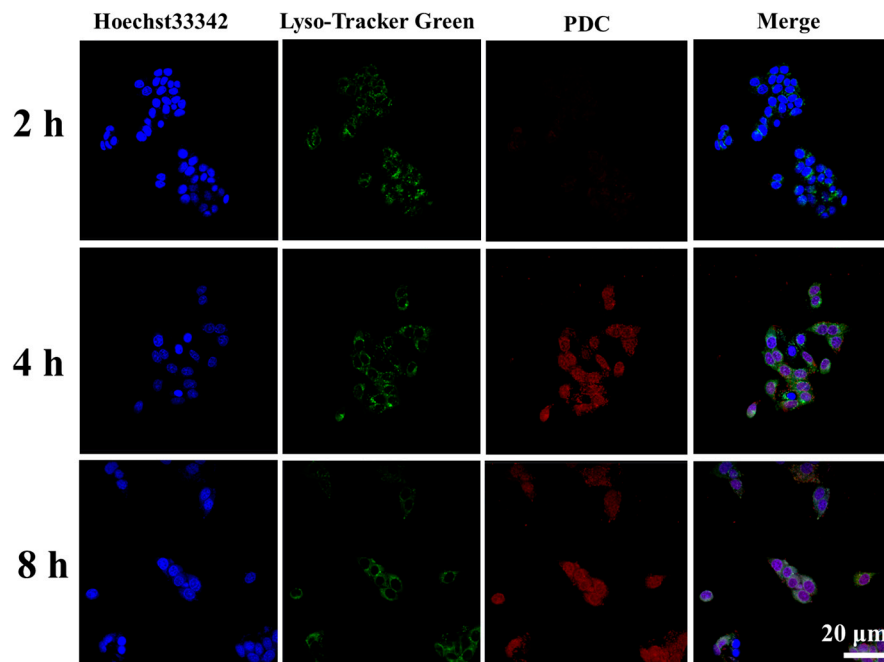

**Figure S3.** CLSM imaging of HER2 negative cell MCF-7 uptake of PDC. Scale bar is 20  $\mu\text{m}$ .

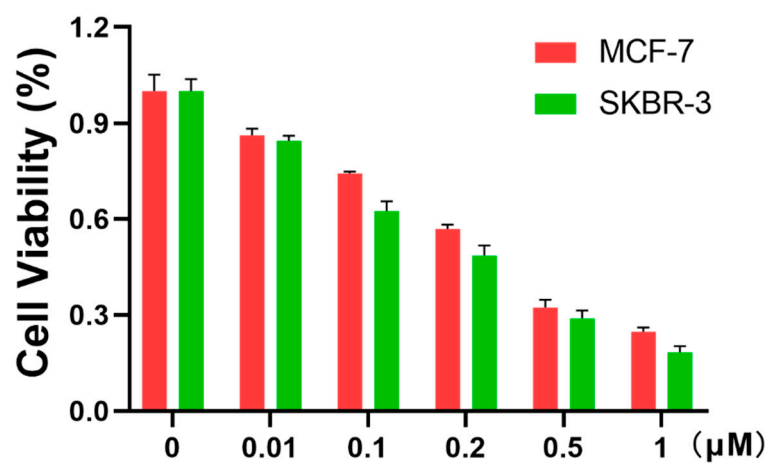

**Figure S4.** Cell viability of SKBR-3 and MCF-7 cells incubated with PDC for 48 h.
